# Supplementary material for: Phenotypic Variability in Novel Doublecortin Gene Variants Associated with Subcortical Band Heterotopia
Source: MDPI journal article supplement (doi:10.3390/ijms25105505), 2024-05-18
Supplement: s1 [file s1]

| no | Gene     |
|----|----------|
| 1  | ARHGEF9  |
| 2  | B3GALNT2 |
| 3  | CDKL5    |
| 4  | CHD2     |
| 5  | CHRNA2   |
| 6  | CHRNA4   |
| 7  | CHRNA2   |
| 8  | DCX      |
| 9  | DEPDC5   |
| 10 | EPM2A    |
| 11 | EPM2B    |
| 12 | FLNA     |
| 13 | FOXG1    |
| 14 | GABRA1   |
| 15 | GABRD    |
| 16 | GABRG2   |
| 17 | GLUT1    |
| 18 | GRIN1    |
| 19 | HCN1     |
| 20 | KCNA2    |
| 21 | KCNQ2    |
| 22 | KCNQ3    |
| 23 | KCNT1    |
| 24 | LGI1     |
| 25 | NPRL3    |
| 26 | PCDH19   |
| 27 | PLCB1    |
| 28 | PNKP     |
| 29 | POMGNT1  |
| 30 | POMGNT2  |
| 31 | PRRT2    |
| 32 | RELN     |
| 33 | SCN1A    |
| 34 | SCN1B    |
| 35 | SCN2A    |
| 36 | SCN8A    |
| 37 | SCN9A    |
| 38 | SLC35A2  |
| 39 | STXBP1   |

**Supplementary Table S1. Targeted panel sequencing.** AmpliSeq custom panel, designed to sequence the coding regions of 39 genes, previously associated with lissencephaly and epilepsy.
